# Supplementary material for: Biomonitoring of Multiple Mycotoxins in Urine by GC–MS/MS: A Pilot Study on Patients with Esophageal Cancer in Golestan Province, Northeastern Iran
Source: MDPI journal article supplement (doi:10.3390/toxins13040243), 2021-03-29
Supplement: s1 [file s1]

# Supplementary Materials: Biomonitoring of Multiple Mycotoxins in Urine by GC–MS/MS: A Pilot Study on Patients with Esophageal Cancer in Golestan Province, Northeastern Iran

Farhad Niknejad, Laura Escrivá, Khoda Berdi Adel Rad, Masoud Khoshnia, Francisco J. Barba and Houda Berrada

Questionnaire Biomonitoring of multiple mycotoxins in urine: Golestan University of Medical Sciences

1. Patients ID
2. Age
3. Gender: ☐Male ☐Female
4. Marital status:
5. Address:
6. History of SCC in family: ☐Yes ☐No
7. Other malignancy history in family: ☐Yes ☐No
8. Weight
9. Height
10. History of Drug use
11. Diet 24 h before urine samples

|                |        |       |
|----------------|--------|-------|
| Bread          | Amount | Types |
| Dairy Products | Amount | Types |
| Drink          | Amount | Types |
| Rice           | Amount | Types |
| Meat           | Amount | Types |
| Vegetables     | Amount | Types |
| Fruits         | Amount | Types |
